# Supplementary material for: Silicon core–hollow carbon shell nanocomposites with tunable buffer voids for high capacity anodes of lithium-ion batteries
Source: Royal Society of Chemistry journal article supplement (doi:10.1039/c2cp42231j), 2012-01-01
Supplement: c2cp42231j.pdf [file c2cp42231j.pdf]

## Supporting information:

### Silicon core-hollow carbon shell nanocomposites with tunable voids for high capacity anodes of lithium-ion batteries

Shuru Chen, Mikhail Gordin, Ran Yi, Giles Howlett, Hiesang Sohn and Donghai Wang\*

*Department of Mechanical & Nuclear Engineering, the Pennsylvania State University, University Park, Pennsylvania 16802, United States. E-mail: dwang@psu.edu*

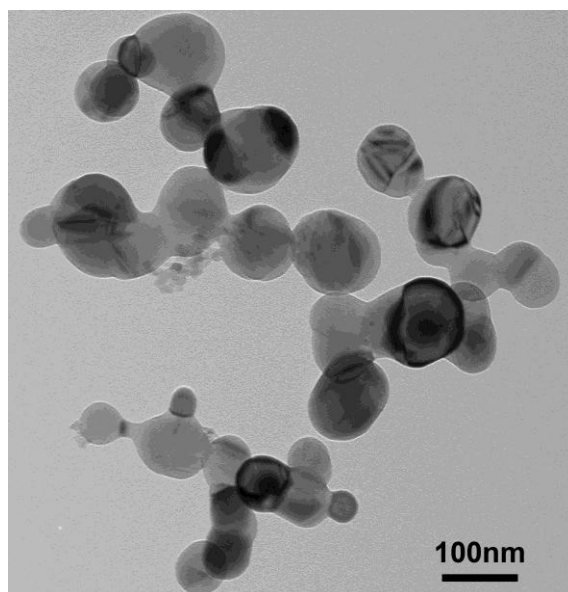

**Fig. S1** TEM image of post-washed Si NPs.

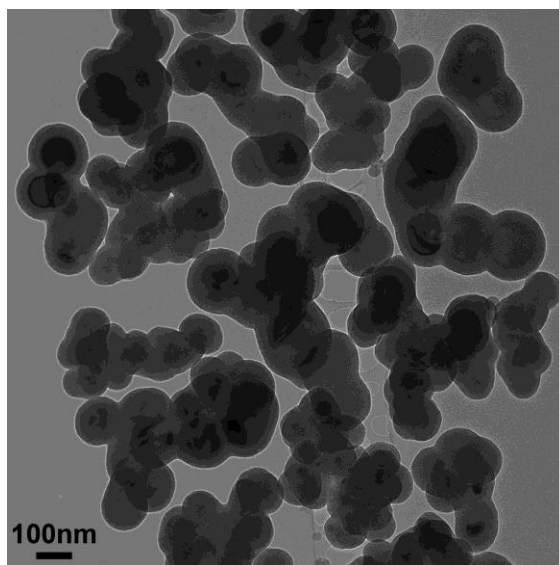

**Fig. S2** TEM image of Si@SiO<sub>2</sub> when TEOS/Si mass ration is 10:1.

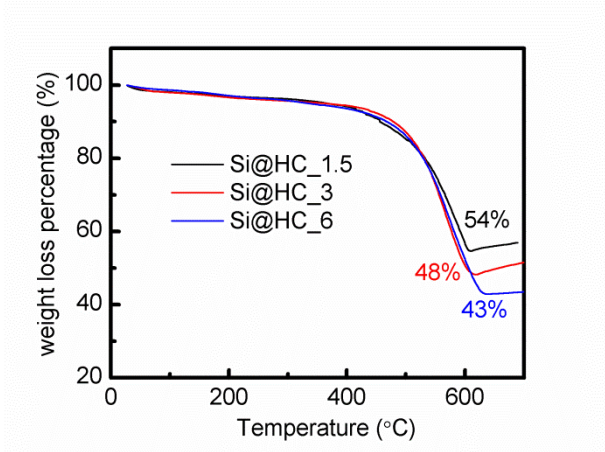

**Fig. S3** TGA curves of Si@HC\_1.5, Si@HC\_3 and Si@HC\_6 under air flow. Weigh loss corresponds to the burning of carbon in the air.

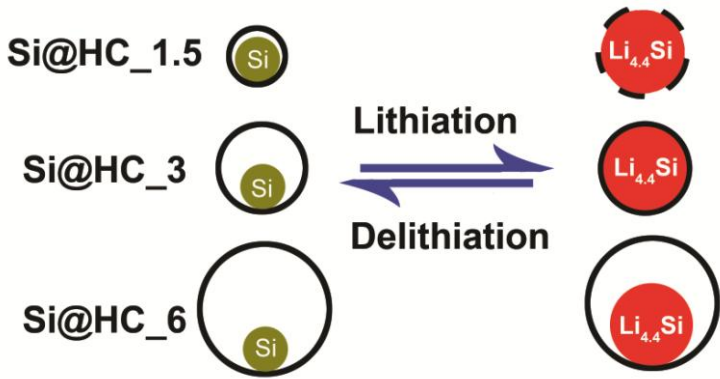

**Fig. S4** Scheme of different Si@HC nanocomposites before and after cycling.

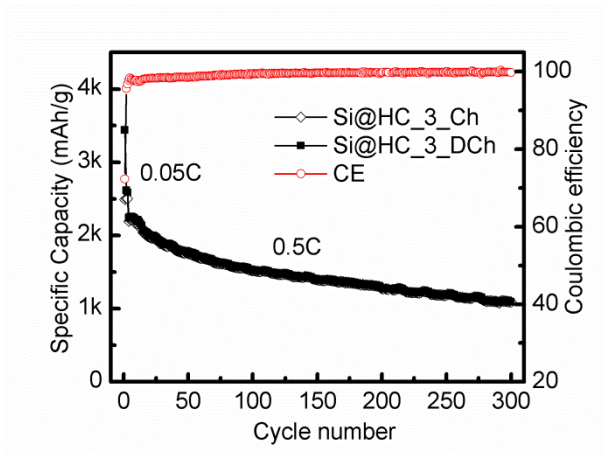

**Fig. S5** Long time cycling performance of Si@HC\_3 at 0.05 C for first 3 cycles then at 0.5 C for up to 300 cycles.
